# Supplementary material for: An enhanced nonpolarity effect of silica-supported perfluoroalkyl sulfonylimide on catalytic fructose dehydration
Source: Royal Society of Chemistry journal article supplement (doi:10.1039/c7cy01340j), 2017-01-01
Supplement: c7cy01340j1.pdf [file c7cy01340j1.pdf]

Supporting Information

## An enhanced nonpolarity effect of silica-supported perfluoroalkyl sulfonylimide on catalytic fructose dehydration

Hai-Juan Zhang,<sup>a</sup> Yuan Cheng,<sup>a</sup> Hong Yuan,<sup>a,b</sup> Yun Wang,<sup>a</sup> Zhong-Hua Ma<sup>a\*</sup>

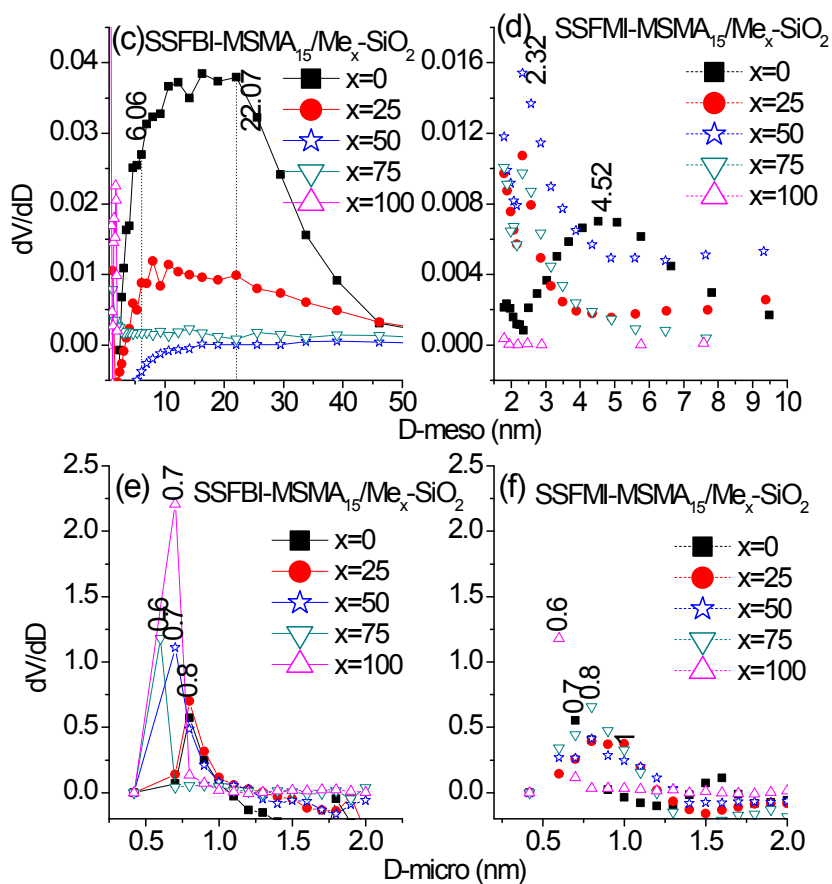

**Fig. S 1** PSD of SSFBI- (c and e) and SSFMI-MSMA<sub>15</sub>/Me<sub>x</sub>-SiO<sub>2</sub> (d and f). BJH meso-PSD (c and d) from adsorption branch (Fig. 2, a and b), and micro-PSD (e and f) from MP method.

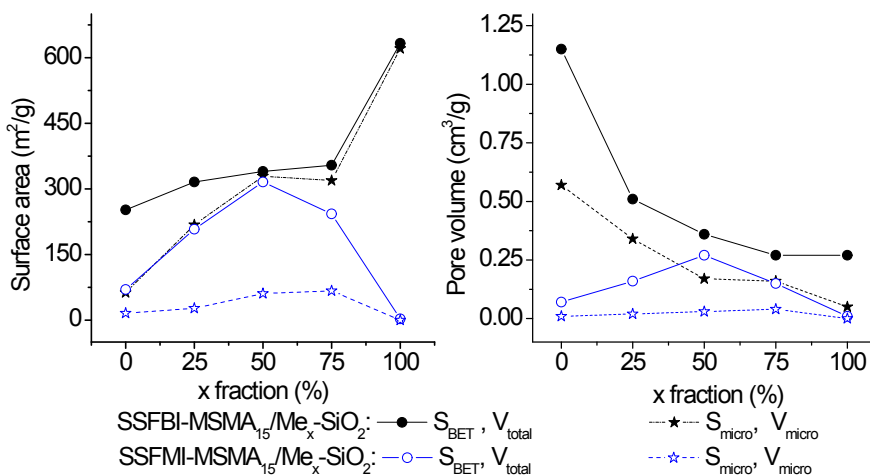

**Fig. S 2** The relationship of surface area/pore volume and fraction of induced -CH<sub>3</sub> moiety.

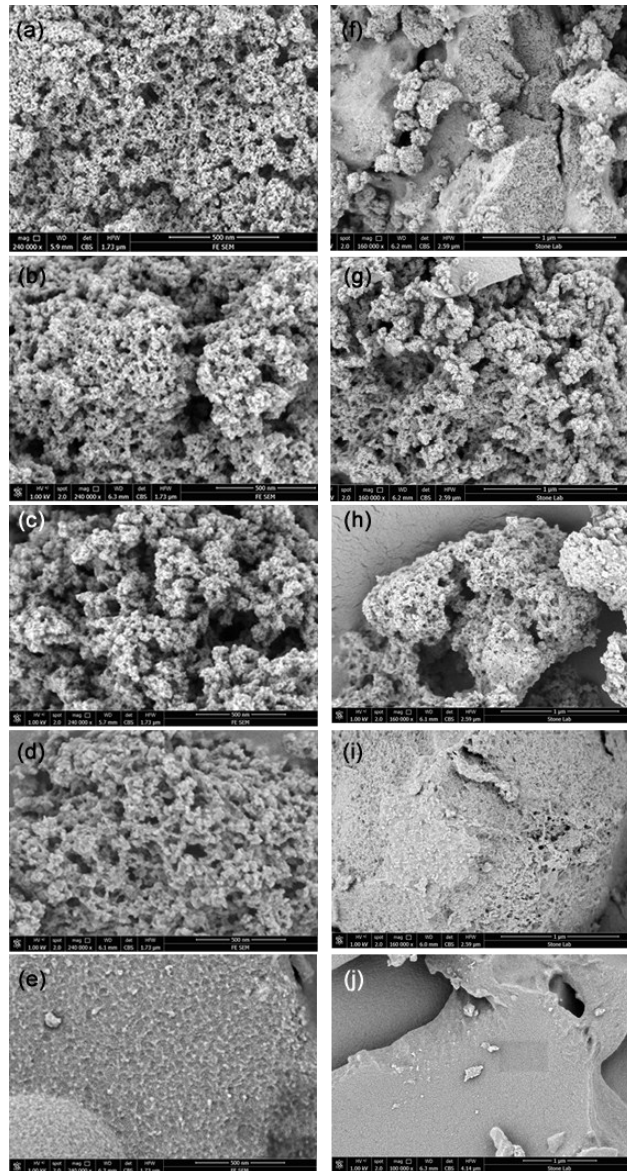

**Fig. S 3** SEM images of SSFBI- (left column) and SSFMI-MSMA<sub>15</sub>/Me<sub>x</sub>-SiO<sub>2</sub> (right column). x=0, 25, 50, 75 and 100, from top to down.

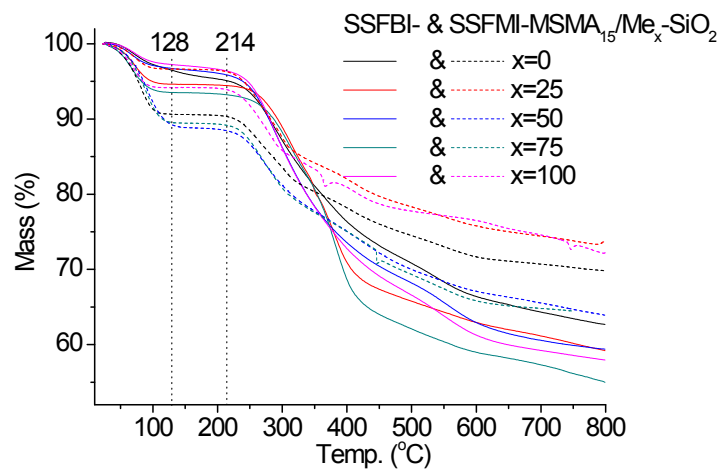

**Fig. S 4** TG analysis of SSFBI- and SSFMI-MSMA<sub>15</sub>/Me<sub>x</sub>-SiO<sub>2</sub> (solid line and dash line, respectively).

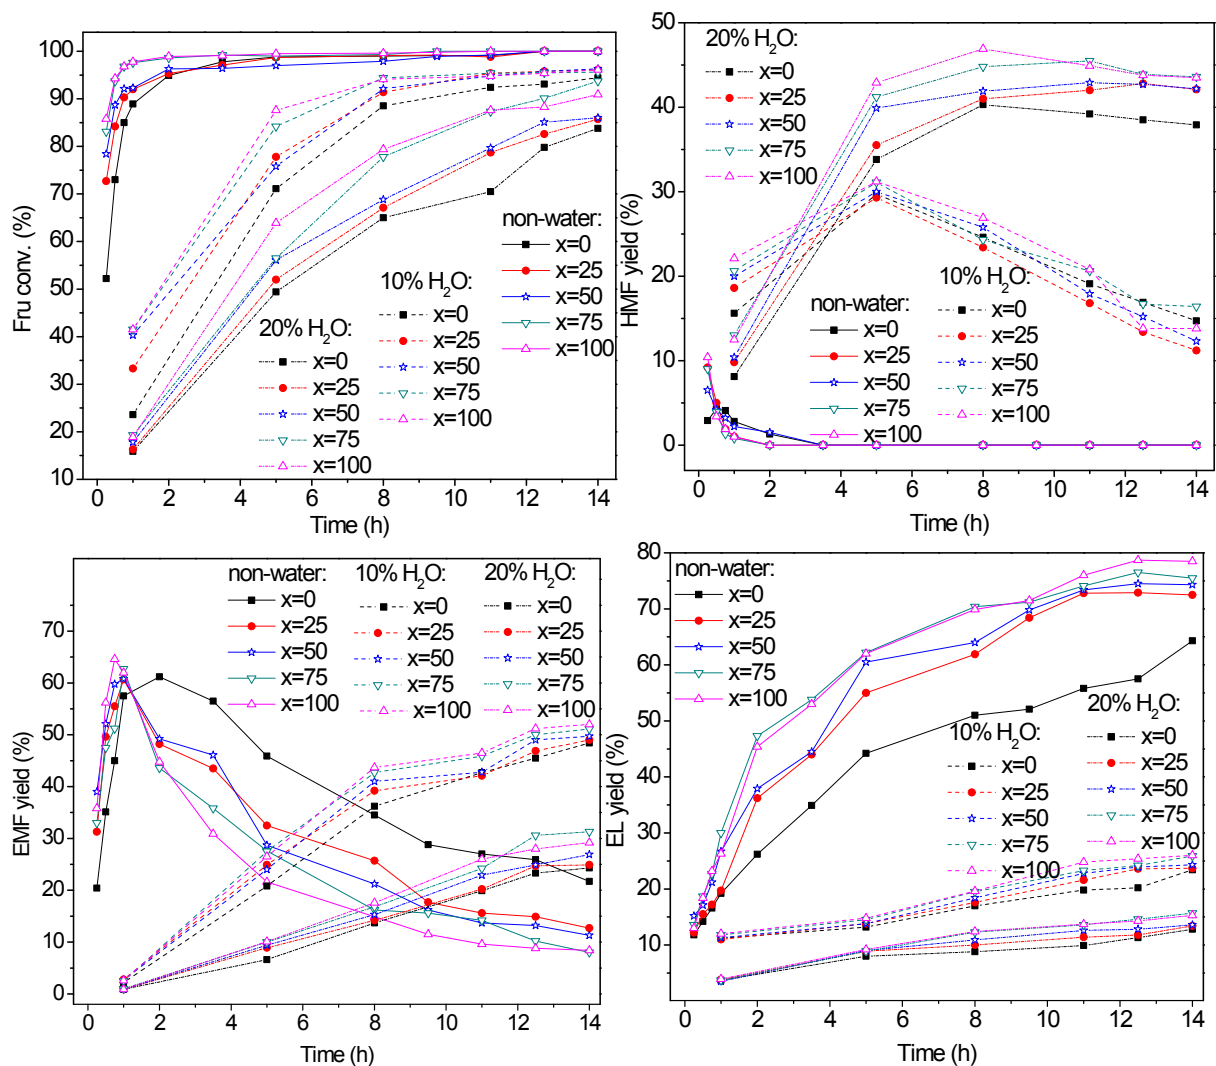

**Fig. S 5** Time course of fructose conversion and HMF/EMF/EL yields using SSFBI-MSMA<sub>15</sub>/Me<sub>x</sub>-SiO<sub>2</sub> as catalyst (x=0, 25, 50, 75, and 100) in nonaqueous- and 10%/20% aqueous-alcohol systems.

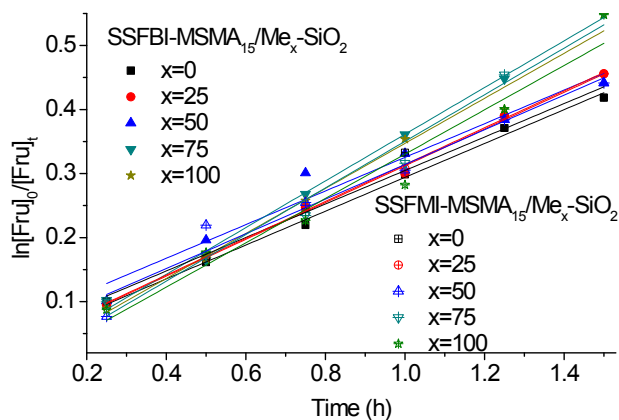

**Fig. S 6** Rate constants of fructose dehydration over ten solid acids.

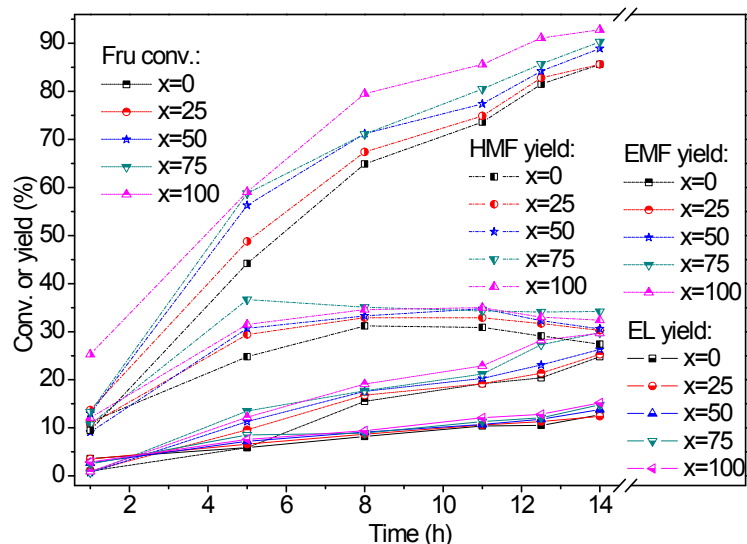

Fig. S 7 Time course of fructose conversion and HMF/EMF/EL yields using SSFMI-MSMA<sub>15</sub>/Me<sub>x</sub>-SiO<sub>2</sub> as catalyst (x=0, 25, 50, 75, and 100) in 20% aqueous-alcohol systems.

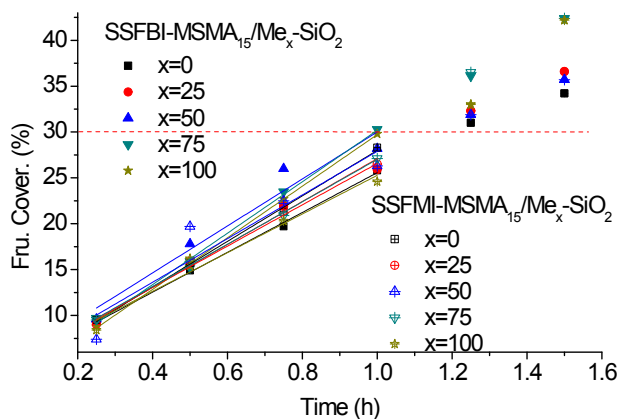

Fig. S 8 Turnover frequency (TOF) of ten solid acids in fructose dehydration.

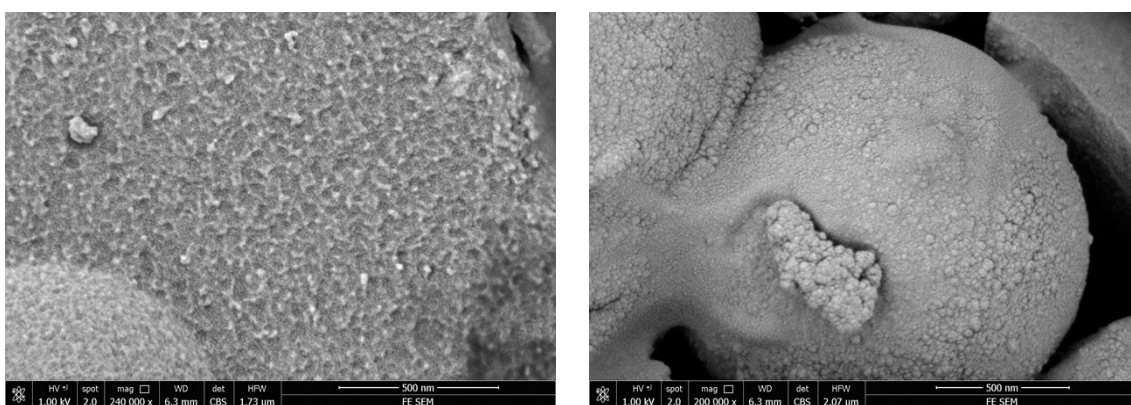

Fig. S 9 SEM images of fresh (left) and recovered (right) SSFBI-MSMA<sub>15</sub>/Me<sub>100</sub>-SiO<sub>2</sub>.

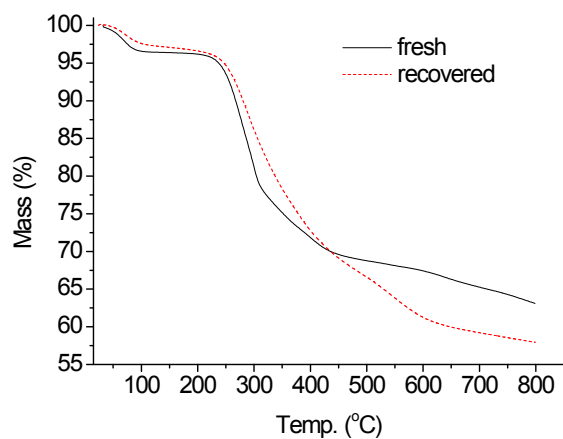

Fig. S 10 TG analysis of fresh and recovered SSFBI-MSMA<sub>15</sub>/Me<sub>100</sub>-SiO<sub>2</sub>.

Table. S 1 SSFBI-MSMA<sub>15</sub>/Me<sub>x</sub>-SiO<sub>2</sub>-catalysed fructose conversion and mass balance

| Cat.  | Added Water (%)      | Fru conv. (%) |     |        | HMF Yield (%) |     |        | EMF Yield (%) |     |        | EL Yield (%) |     |       |
|-------|----------------------|---------------|-----|--------|---------------|-----|--------|---------------|-----|--------|--------------|-----|-------|
|       |                      | 1 h           | 8 h | 12.5 h | 1 h           | 8 h | 12.5 h | 1 h           | 8 h | 12.5 h | 1 h          | 8 h | 12.5h |
| x=0   | Non-water            | 89            | 99  | 100    | 3             | -   | -      | 58            | 35  | 26     | 19           | 51  | 58    |
|       | 10% H <sub>2</sub> O | 24            | 89  | 93     | 16            | 25  | 25     | 2             | 36  | 46     | 11           | 17  | 20    |
|       | 20% H <sub>2</sub> O | 16            | 65  | 80     | 8             | 40  | 40     | 1             | 14  | 23     | 4            | 9   | 11    |
| x=25  | Non-water            | 92            | 99  | 100    | 1             | -   | -      | 61            | 26  | 15     | 20           | 62  | 73    |
|       | 10% H <sub>2</sub> O | 33            | 91  | 96     | 19            | 23  | 23     | 2             | 39  | 47     | 11           | 18  | 24    |
|       | 20% H <sub>2</sub> O | 16            | 67  | 83     | 10            | 41  | 41     | 1             | 14  | 25     | 4            | 10  | 12    |
| x=50  | Non-water            | 92            | 98  | 100    | 2.2           | -   | -      | 61            | 21  | 13     | 27           | 64  | 75    |
|       | 10% H <sub>2</sub> O | 40            | 92  | 97     | 20            | 26  | 26     | 3             | 41  | 48     | 11           | 18  | 23    |
|       | 20% H <sub>2</sub> O | 18            | 69  | 85     | 11            | 42  | 42     | 1             | 15  | 25     | 4            | 11  | 13    |
| x=75  | Non-water            | 98            | 99  | 100    | 1             | -   | -      | 63            | 16  | 10     | 30           | 70  | 77    |
|       | 10% H <sub>2</sub> O | 42            | 94  | 96     | 21            | 24  | 24     | 3             | 43  | 50     | 12           | 20  | 24    |
|       | 20% H <sub>2</sub> O | 19            | 78  | 90     | 13            | 45  | 45     | 1             | 17  | 30     | 4            | 12  | 14    |
| x=100 | Non-water            | 98            | 100 | 100    | 1             | -   | -      | 62            | 15  | 9      | 26           | 70  | 79    |
|       | 10% H <sub>2</sub> O | 42            | 94  | 95     | 22            | 27  | 25     | 3             | 44  | 51     | 12           | 20  | 23    |
|       | 20% H <sub>2</sub> O | 19            | 79  | 88     | 13            | 47  | 46     | 1             | 18  | 27     | 4            | 12  | 14    |
